# Supplementary material for: In vivo assessment of newly synthesized achiral copper(ii) and zinc(ii) complexes of a benzimidazole derived scaffold as a potential analgesic, antipyretic and anti-inflammatory
Source: Royal Society of Chemistry journal article supplement (doi:10.1039/c5ra25071d), 2016-01-01

**Electronic Supplementary Information**

***In vivo* assessment of newly synthesized achiral copper (II) and zinc (II) complexes of benzimidazole derived scaffold as a potential analgesic, antipyretic and anti-inflammatory.**

Mohamed F. Al Ajmi,<sup>a</sup> Afzal Hussain,<sup>a</sup> Ali Alsalmeh,<sup>b</sup> and Rais Ahmad Khan<sup>b\*</sup>

<sup>a</sup> *Department of Pharmacognosy, College of Pharmacy, King Saud University, P.O. Box 2457, Riyadh 11451, KSA*

<sup>b</sup> *Department of Chemistry, College of Science, King Saud University, P.O. Box 2455, Riyadh 11451, KSA.*

**Fig S1.** Ultra performance Liquid Chromatograms (UPLC) of [L], [CuL2] and [ZnL2].

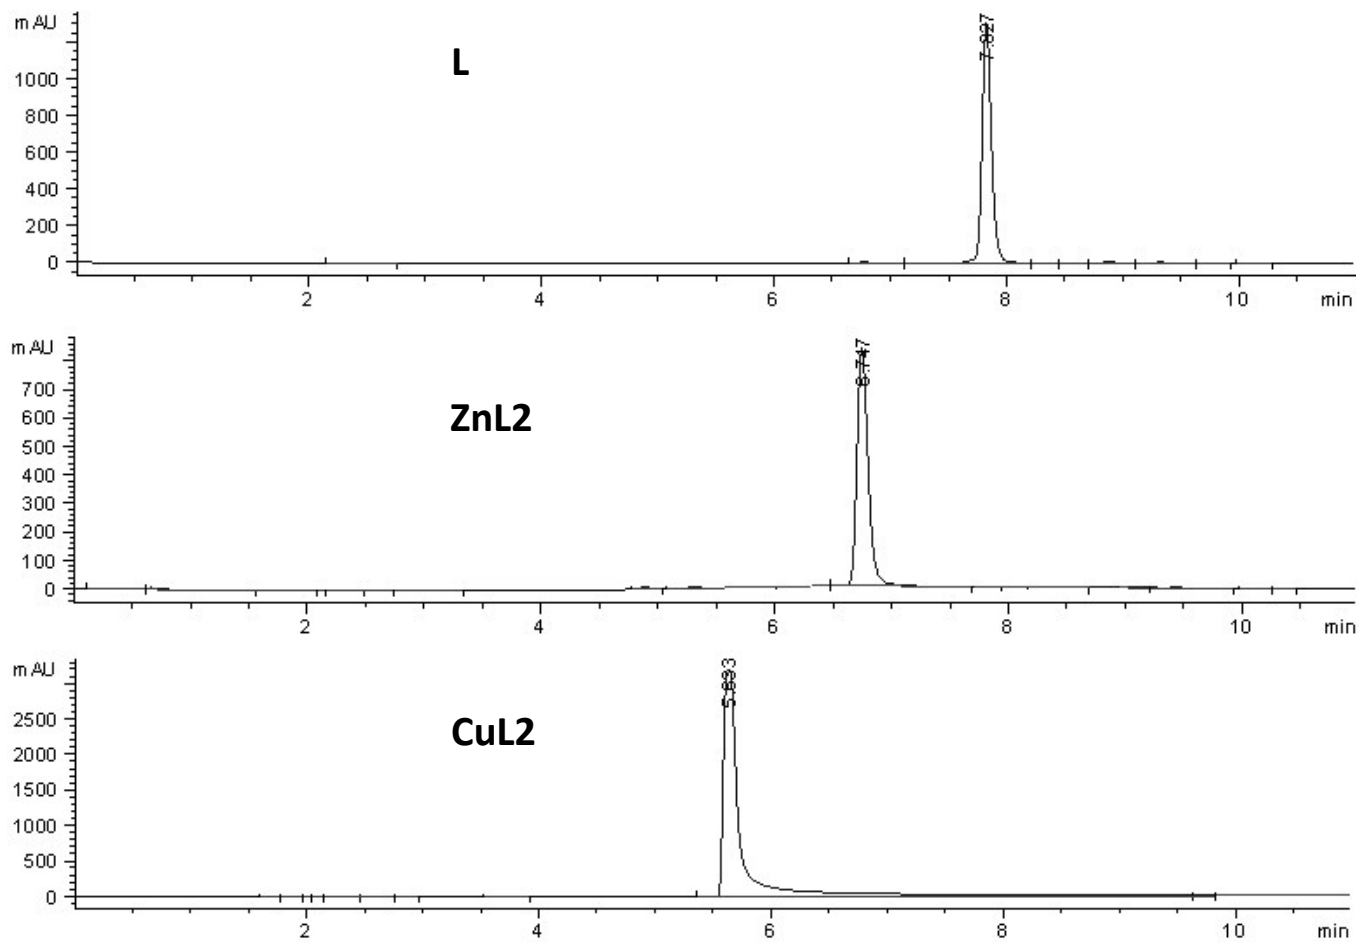

Figure S2. Infra-red spectrum of the Schiff base (L).

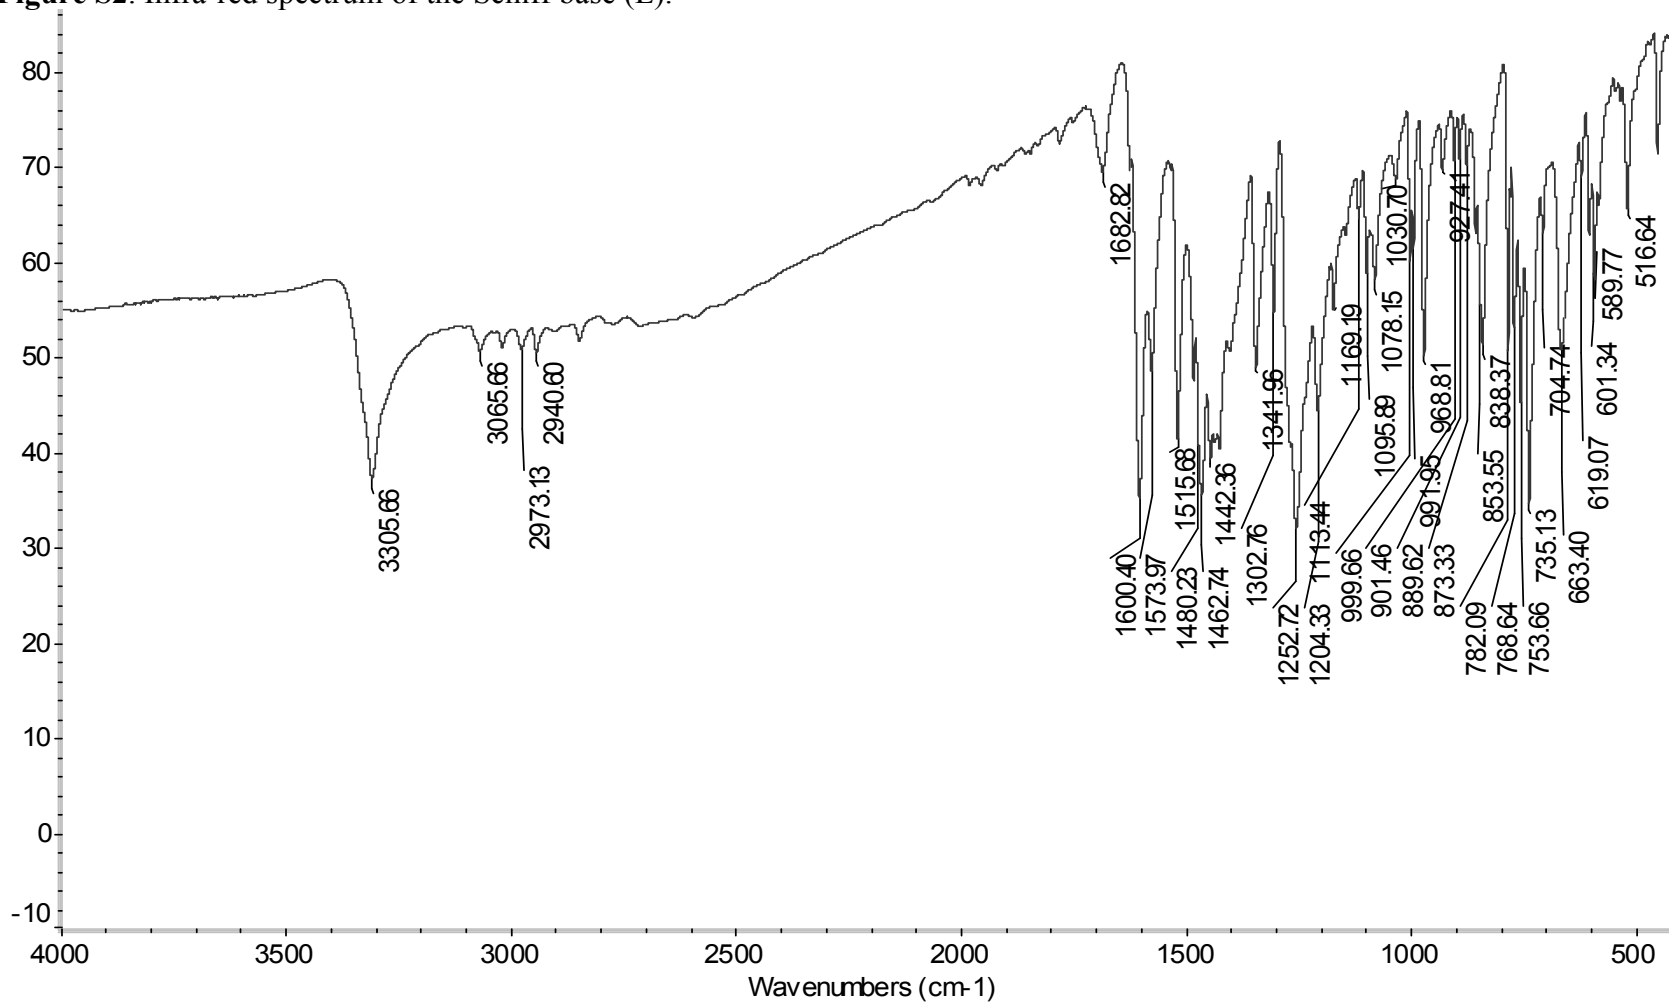

**Figure S3.** Infra-red spectrum of the copper complex [CuL<sub>2</sub>].

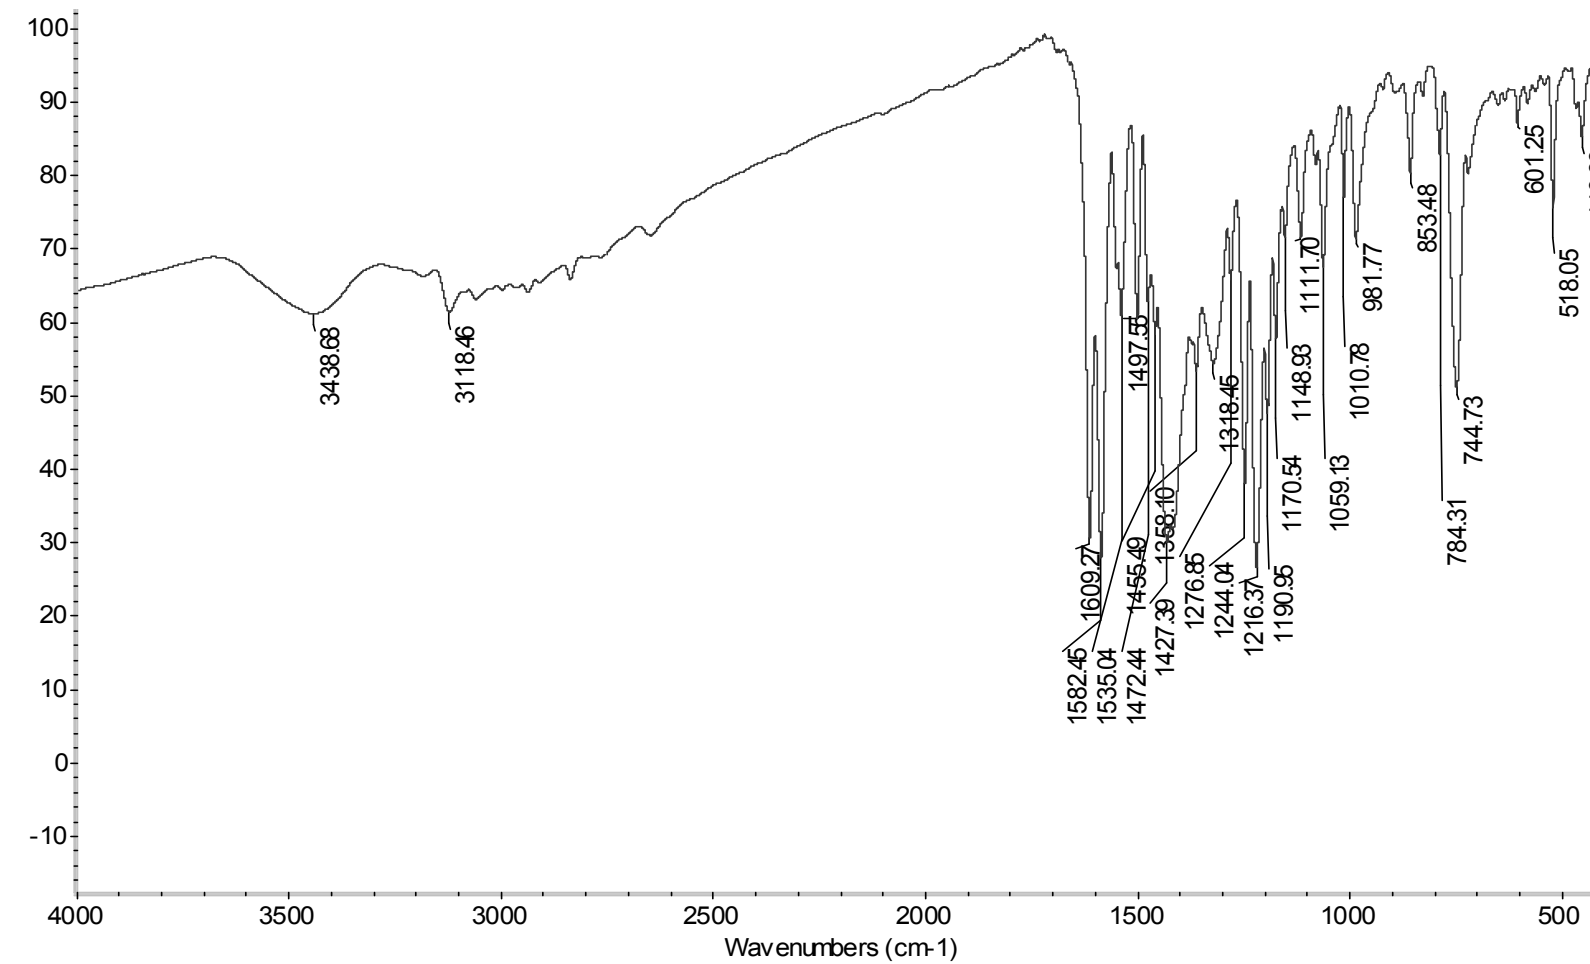

**Figure S4.** Infra-red spectrum of the zinc complex [**ZnL<sub>2</sub>**].

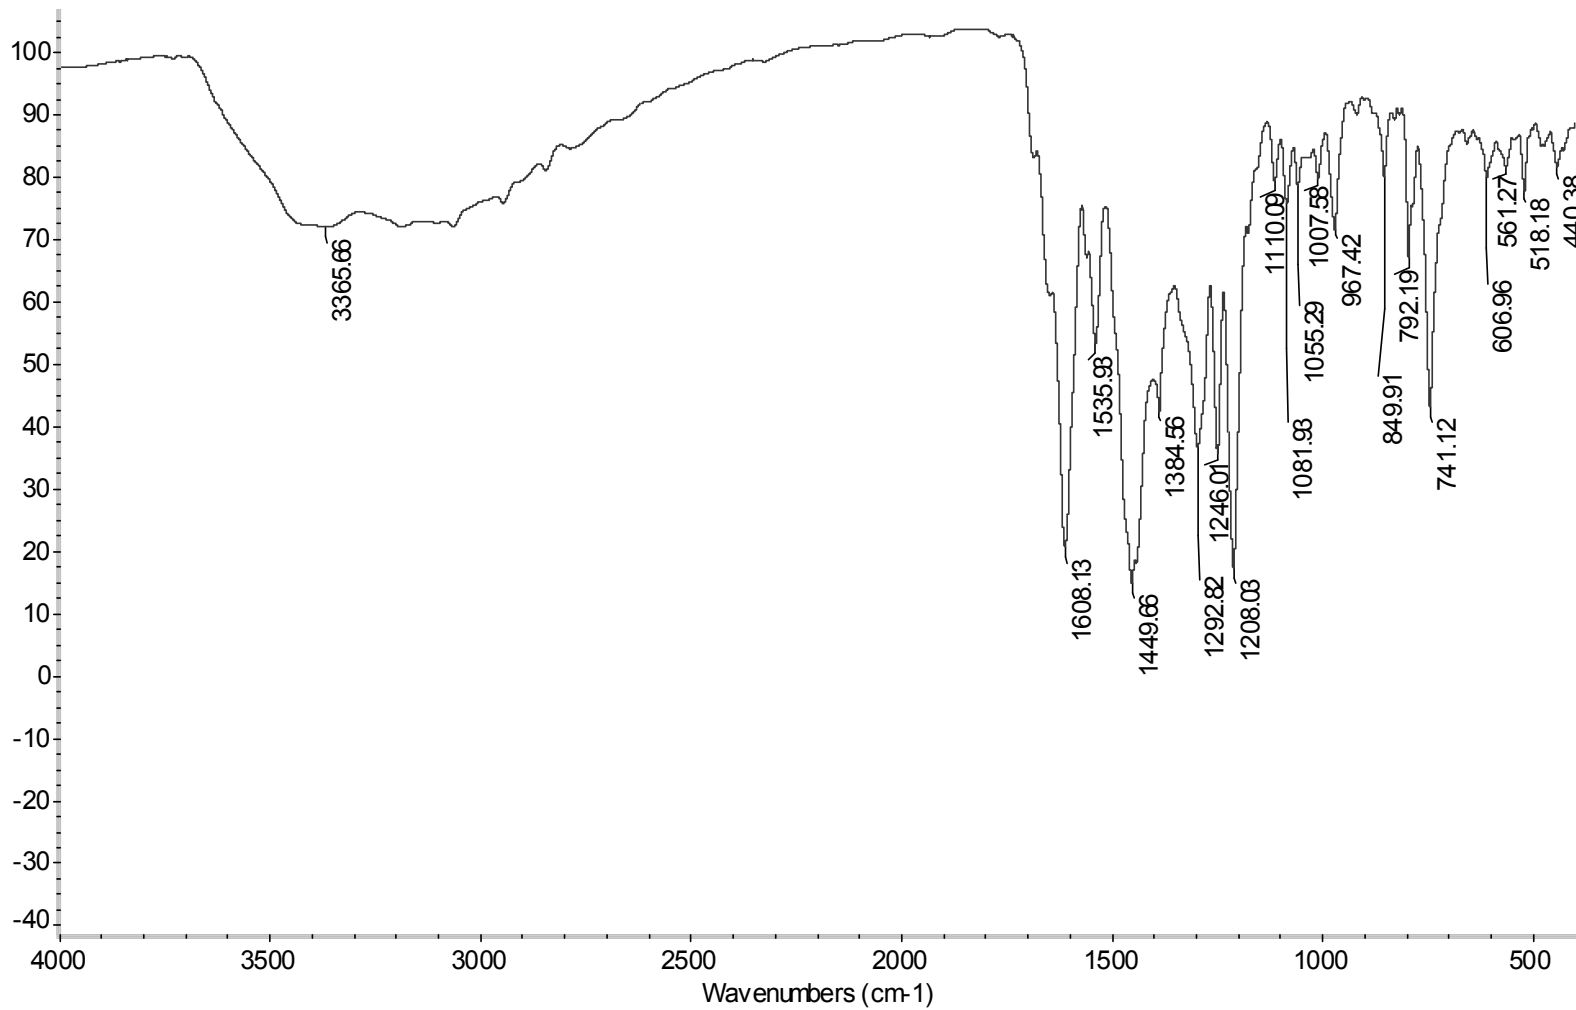

Figure S5.  $^1\text{H}$  NMR spectrum of the Schiff base (L).

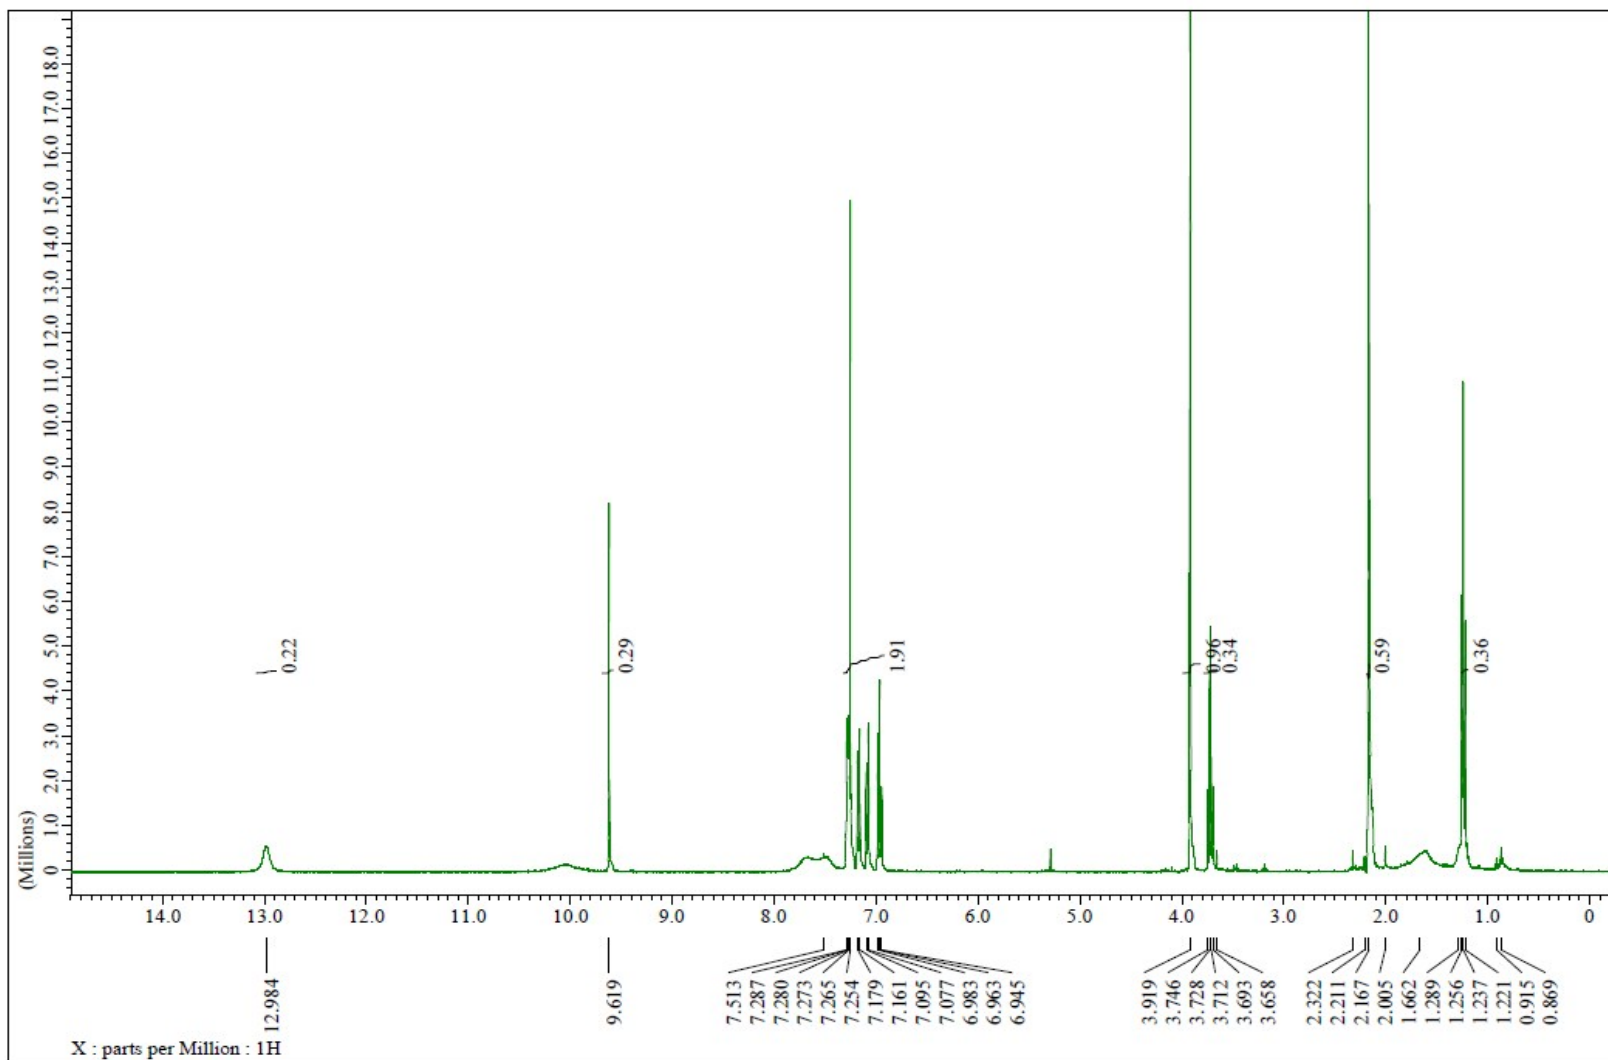

**Figure S6.**  $^{13}\text{C}$  NMR spectrum of the Schiff base (L).

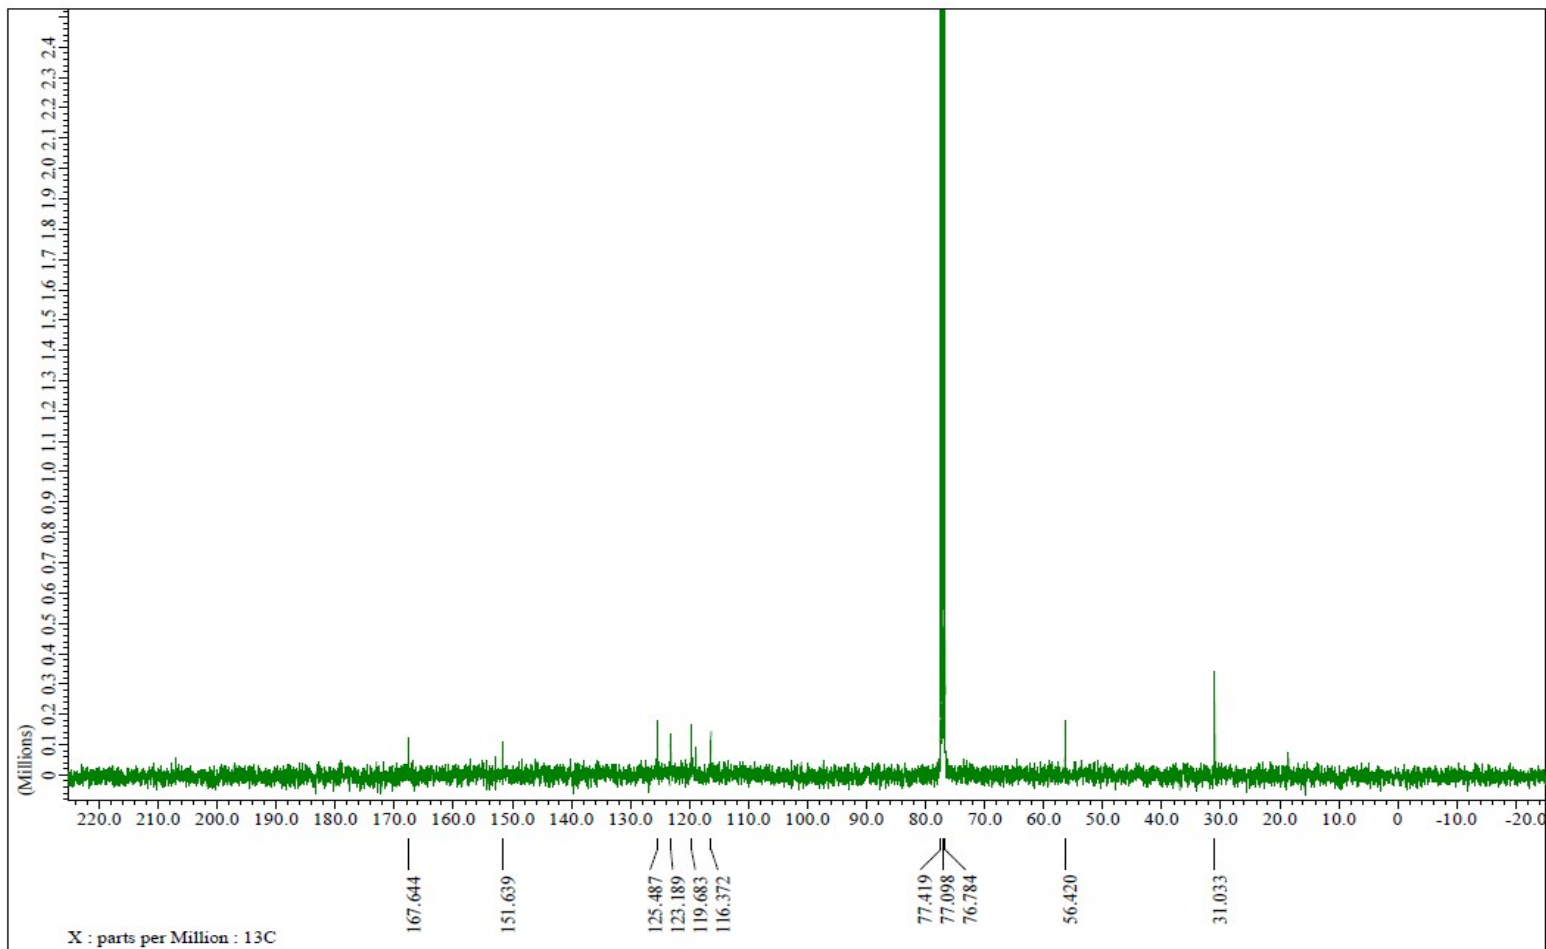

Figure S7.  $^1\text{H}$  NMR spectrum of the Zinc complex.

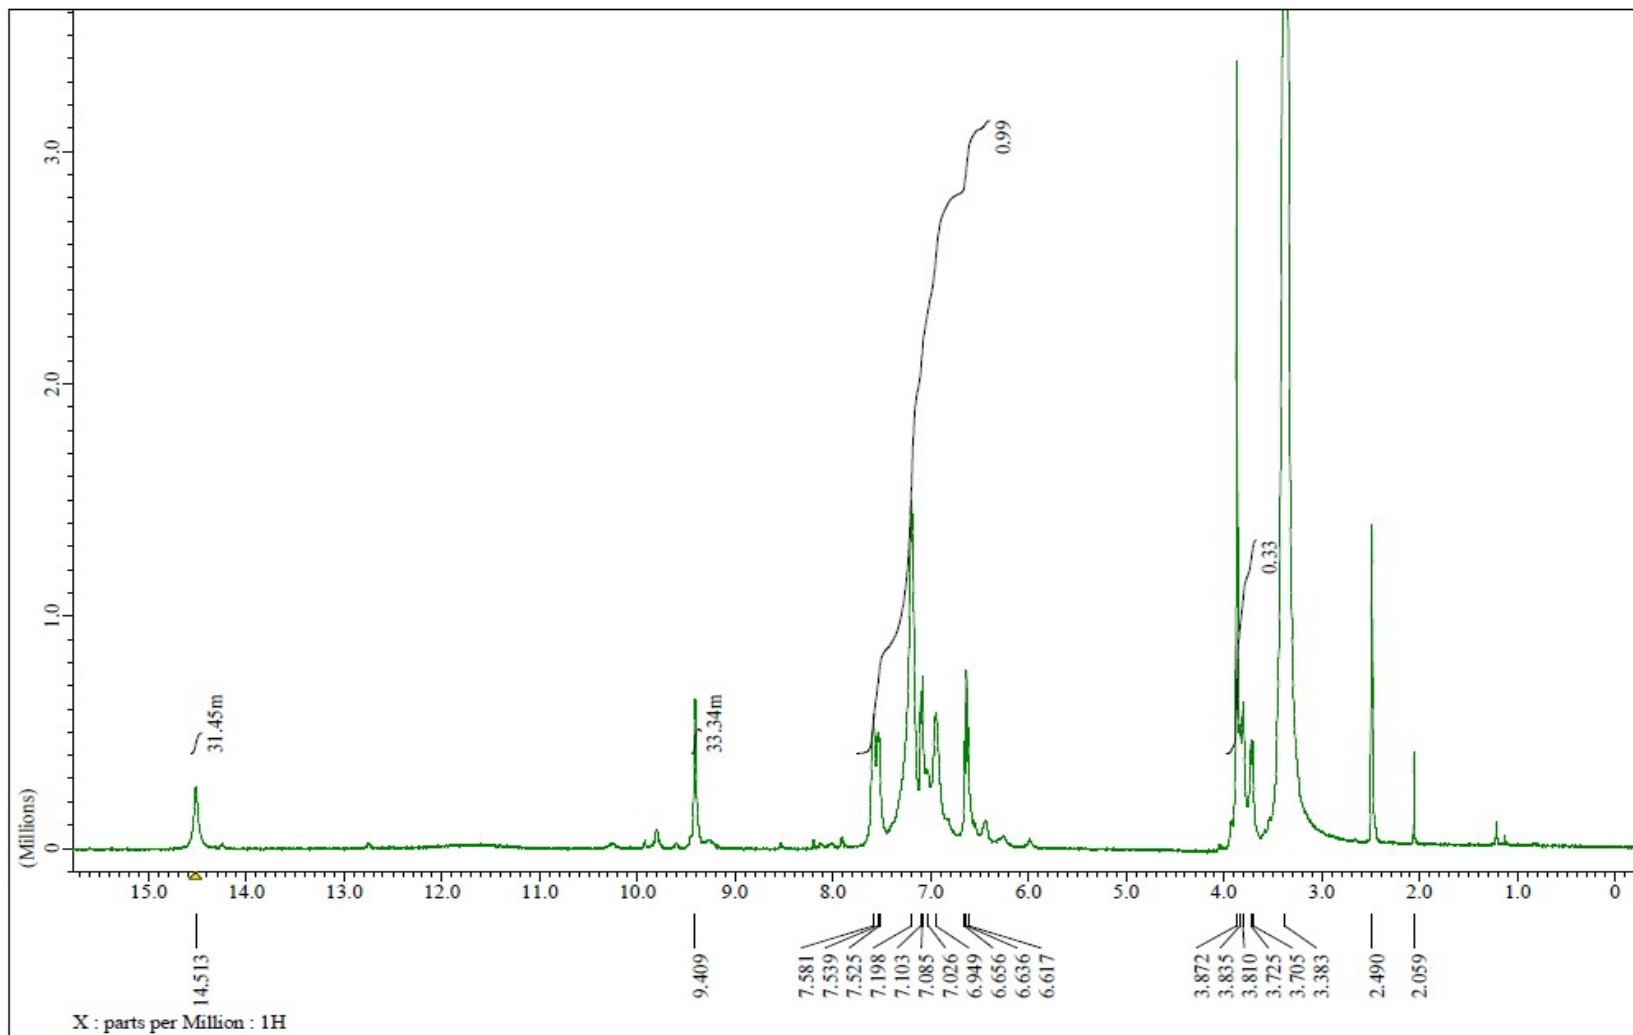



**Figure S8.**  $^{13}\text{C}$  NMR spectrum of the Zinc complex.

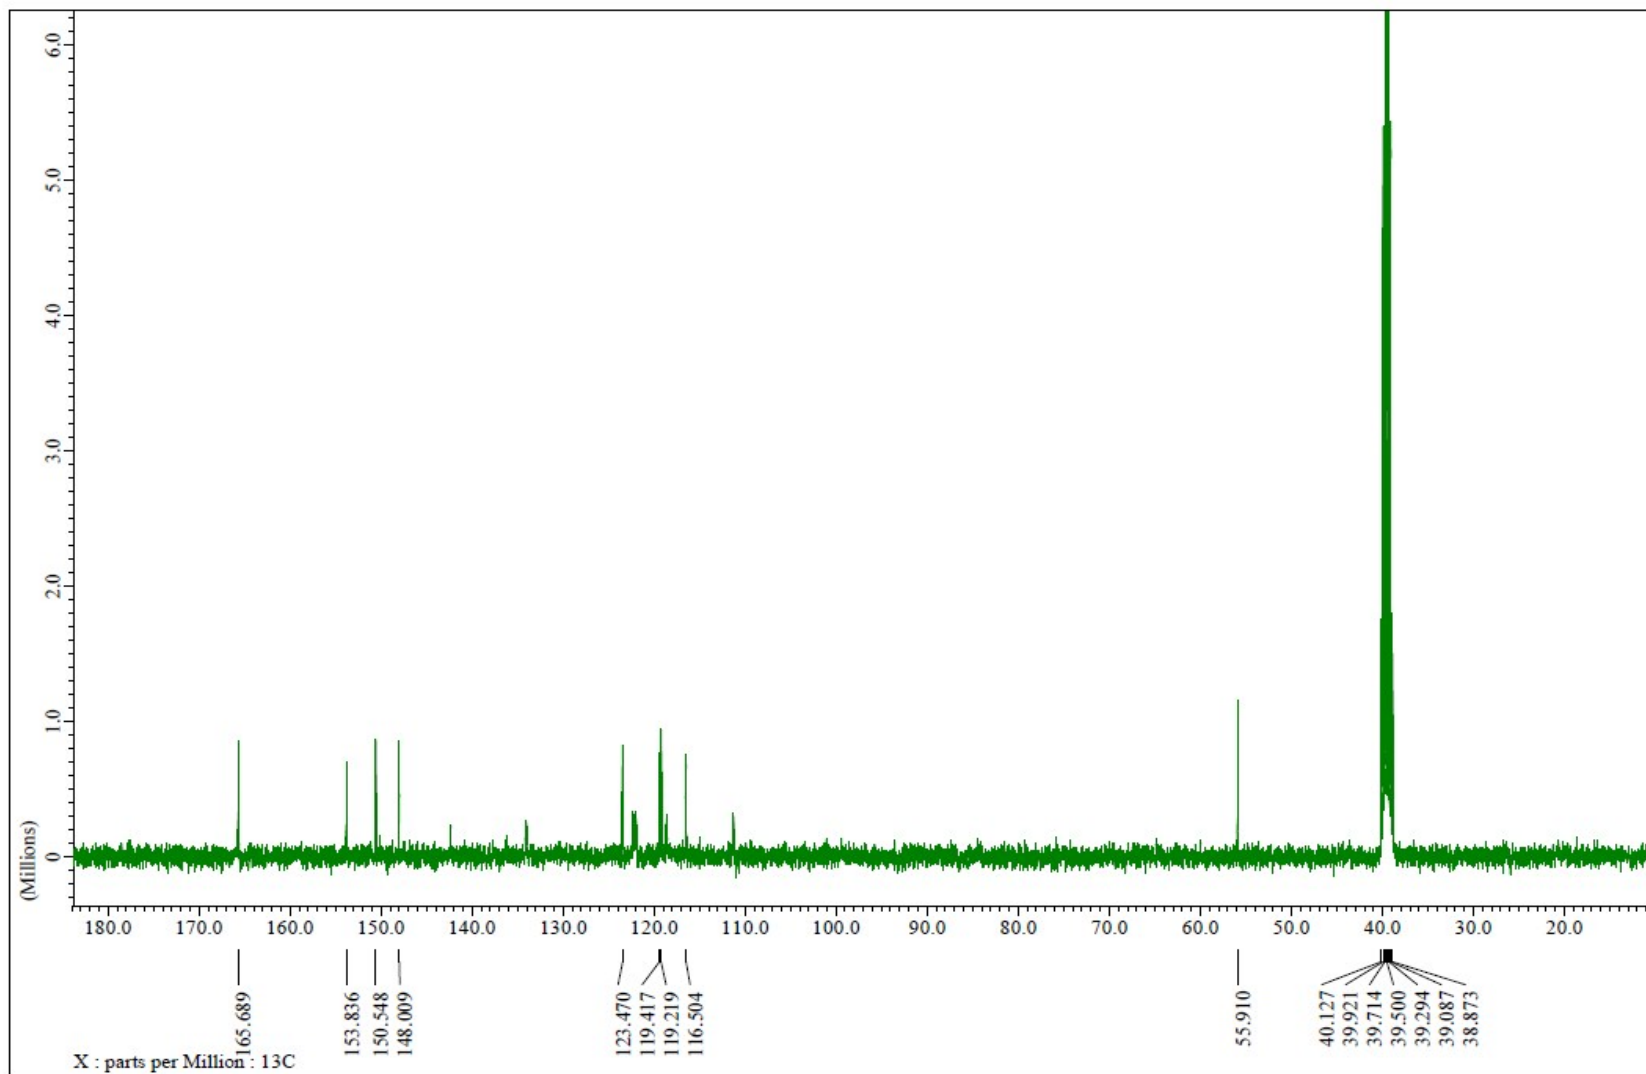

**Figure S9.** EPR spectrum of the copper(II) complex in solution (DMSO).

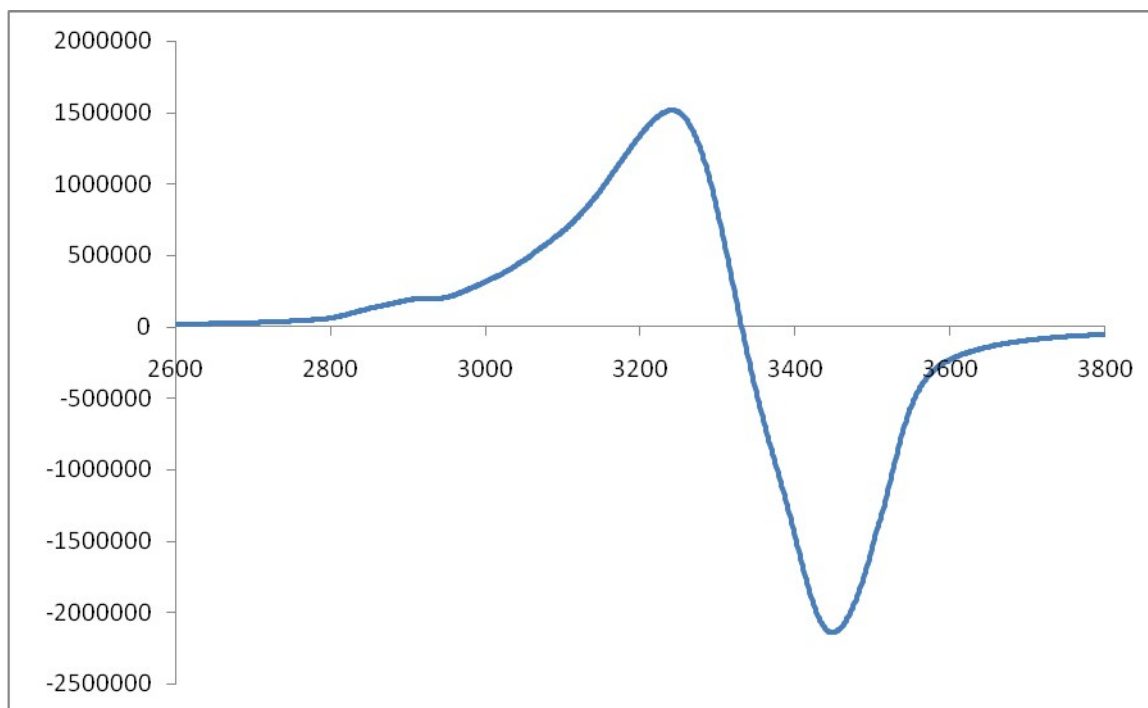

**Fig S10.** HRMS spectrum of the Schiff base (L).

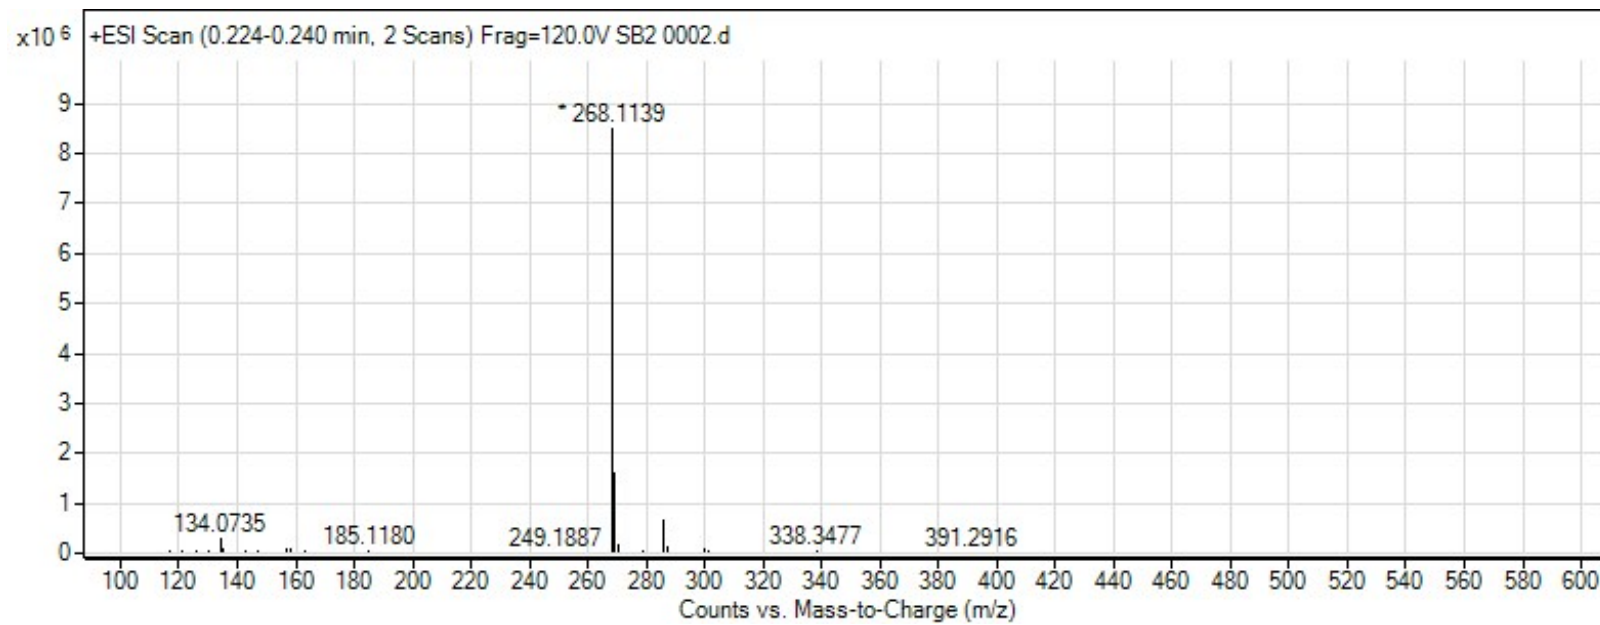

**Fig S11.** HRMS spectrum of the copper complex.

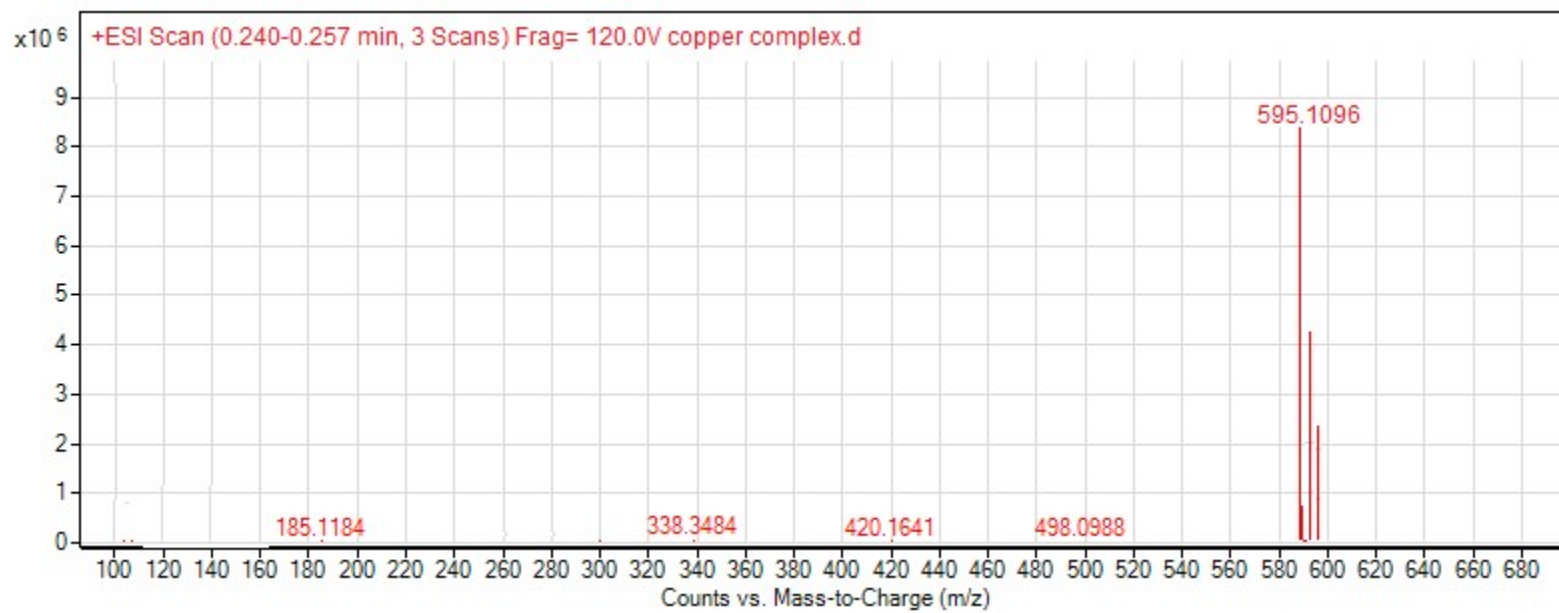

**Fig S12.** HRMS spectrum of the zinc complex.

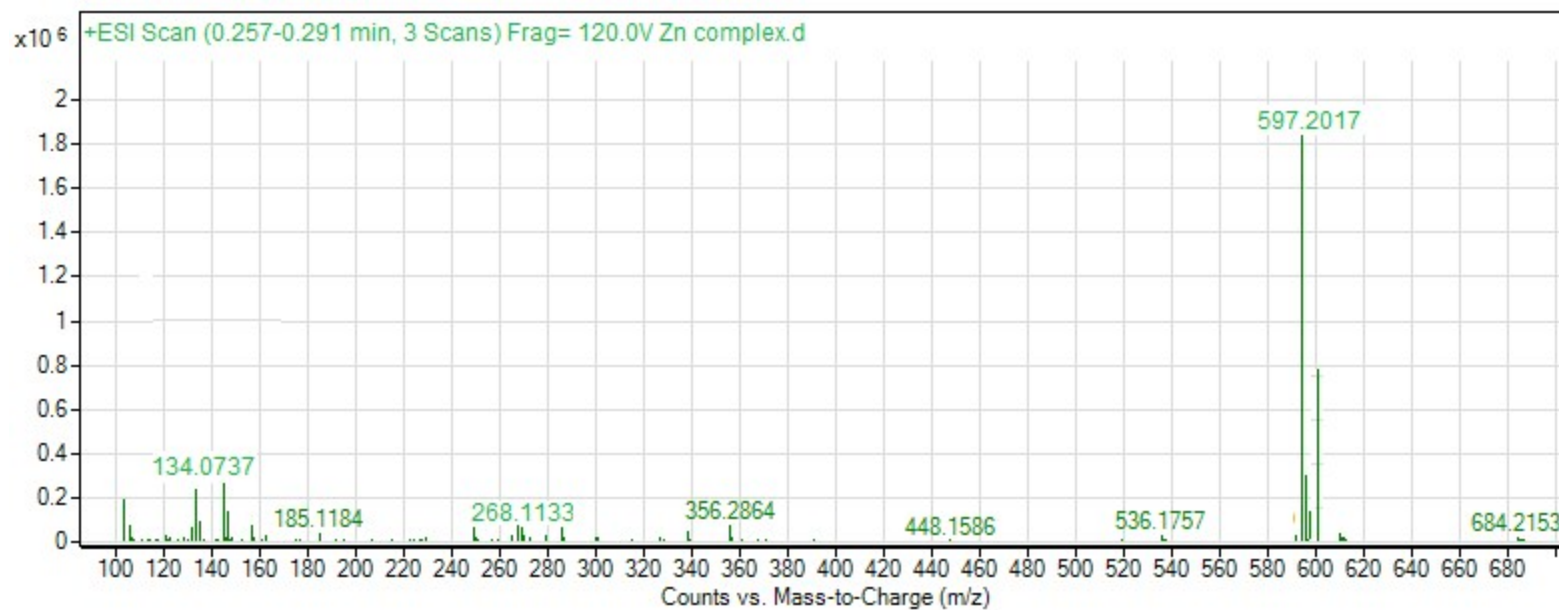

Supplement: c5ra25071d1.pdf [file c5ra25071d1.pdf]
